# Supplementary material
Source: MDPI journal article supplement (https://www.mdpi.com/2311-7524/7/6/156)
Supplement: s1 [file s1]

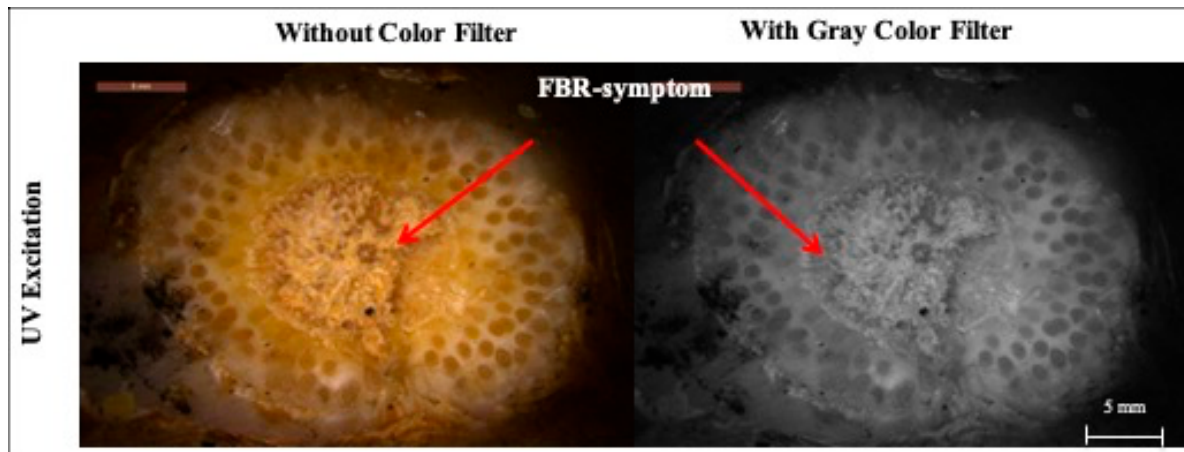

**Supplementary Figure S1:** Stereo-fluorescence images of FBR infected basal plate tissue to show the original color of a FBR infected basal plate after UV excitation without any filter (left). Microscopic images were captured by a Leica© M165FC Stereo-Fluorescence microscope mounted with an Ultraviolet dual filter [excitation - 360/40 nm (340 – 380 nm) and barrier - 420 LP]. Bar length = 5 mm.
